# Supplementary material for: Preparation of functionalized protein materials assisted by mechanochemistry
Source: Springer Nature journal article supplement (doi:10.1007/s10853-018-2461-7), 2018-06-18
Supplement: MOESM1 [file 15859118]

**Preparation of functionalized protein materials assisted by mechanochemistry**

Lei Wang and Niclas Solin*

Department of Physics, Chemistry, and Biology; Biomolecular and Organic Electronics, Linköping University, 581 83 Linköping, Sweden

*Address correspondence to e-mail niclas.solin@liu.se


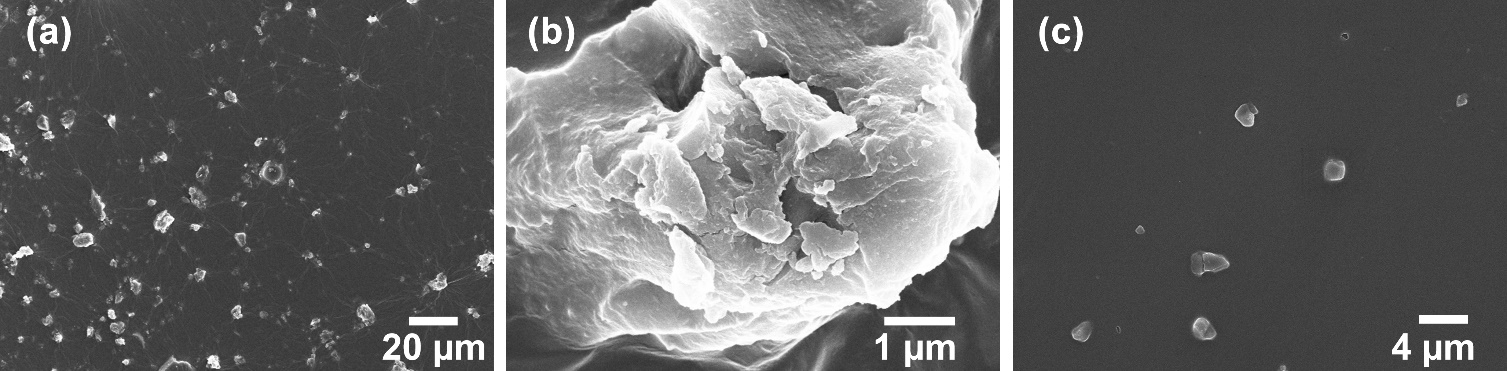


**Figure S1** SEM images of 6T:HEWL composites powder after grinding with mortar and pestle (a, b) and of the resulting composites dissolved by 25 mM HCl and then drop casted onto Si substrate (c).


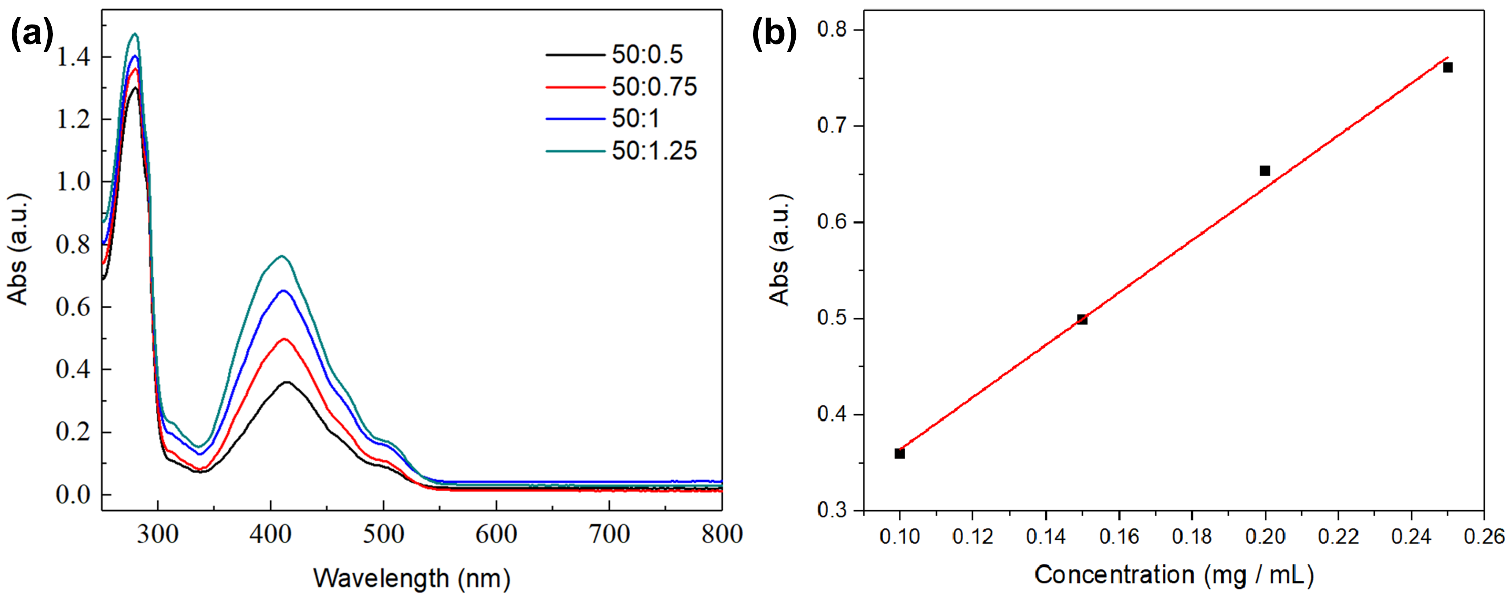


**Figure S2** Absorbance spectra at 25 mM HCl for samples of 50 mg HEWL ground with variety amount of 6T by a shaker mill (a); Calibration curve of 6T concentration y=2.721x+ 0.092, R2=0.995 (b)


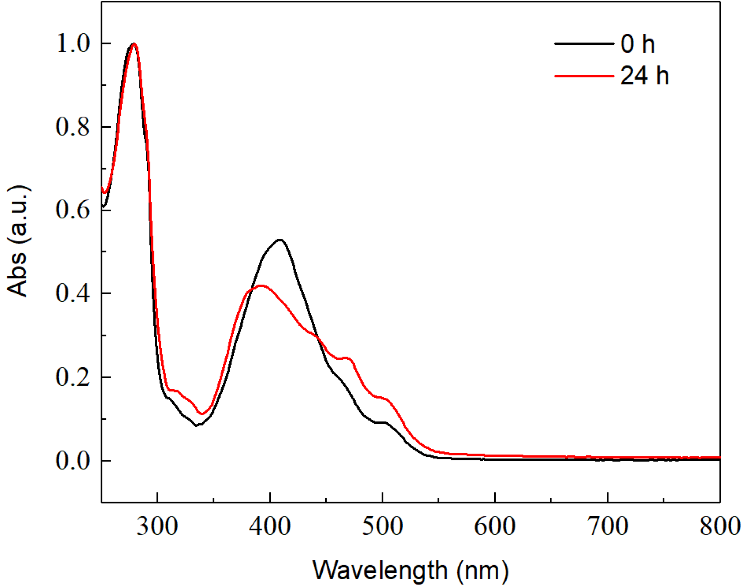


**Figure S3** Absorbance spectra in 25 mM HCl for samples of 6T:HEWL before (0 h) and after fibril formation (24 h). The 6T:HEWL composite material was prepared prepared by grinding in a shaker mill.


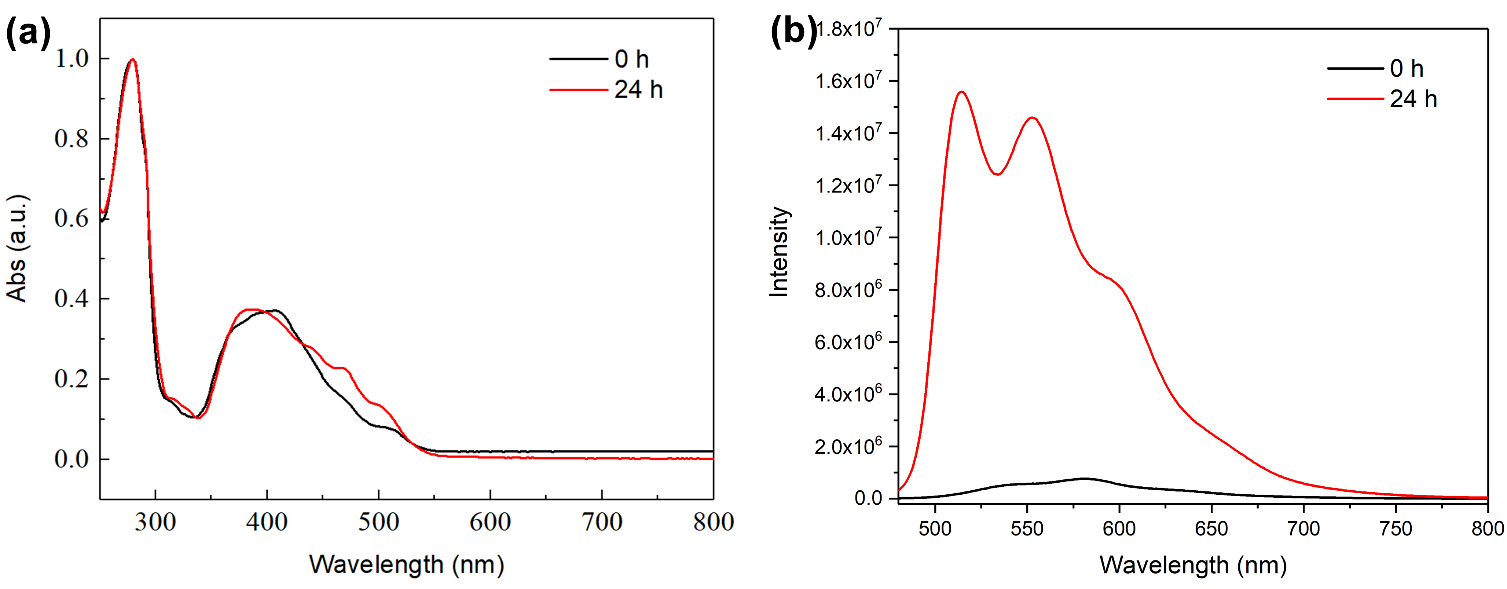


**Figure S4** Absorbance spectra (a) and fluorescence spectra (b) in 25 mM HCl for samples of 6T:HEWL before (0 h) and after fibril formation (24 h). The 6T:HEWL composite material was prepared by hand-grinding with mortar and pestle.


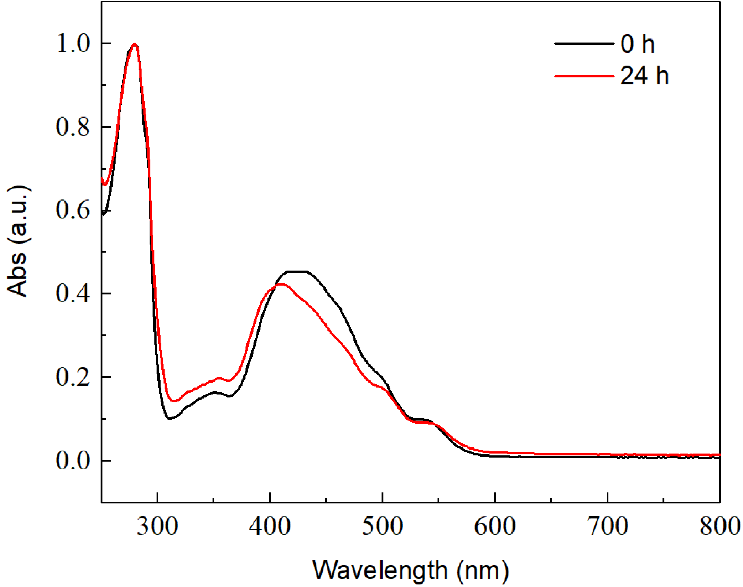


**Figure S5** Absorbance spectra at 25 mM HCl for samples of 8T:HEWL before(0 h) and after fibril formation (24 h). The 8T:HEWL composite material was prepared by grinding in a shaker mill.


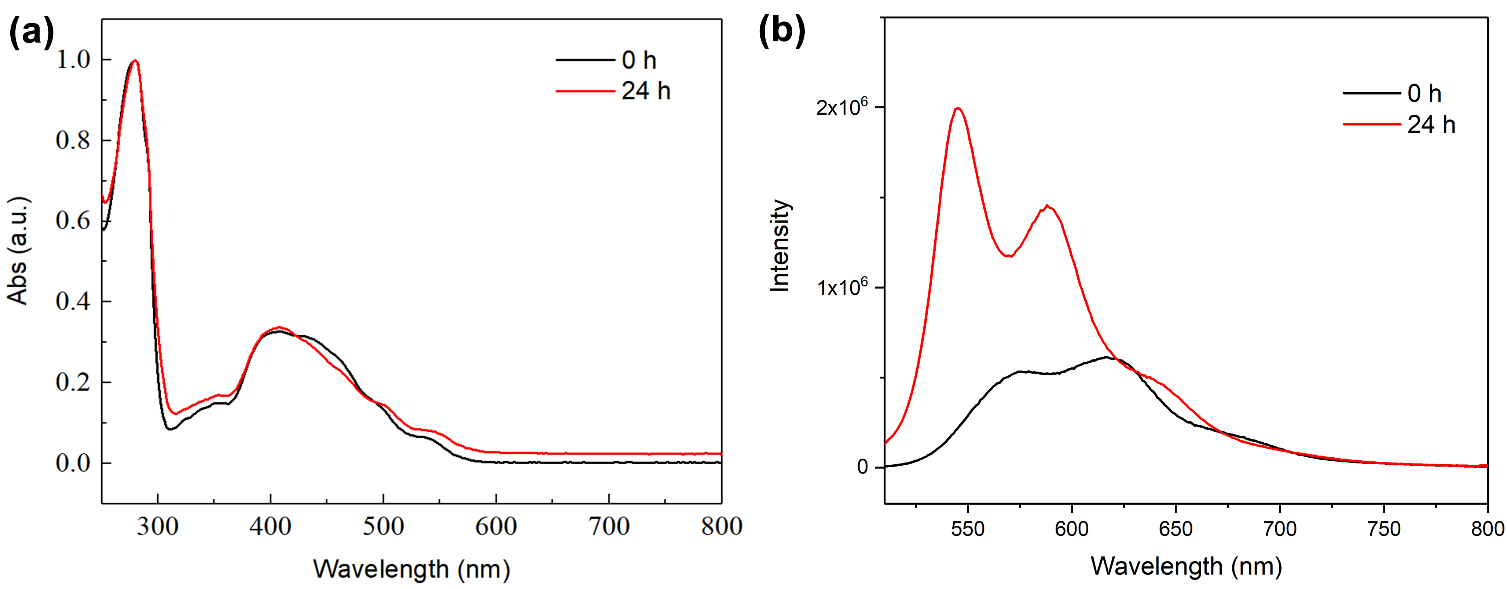


**Figure S6** Absorbance spectra (a) and fluorescence spectra (b) in 25 mM HCl for samples before (0 h) and after fibril formation (24 h). The8T:HEWL composite material was prepared by hand-grinding with mortar and pestle.


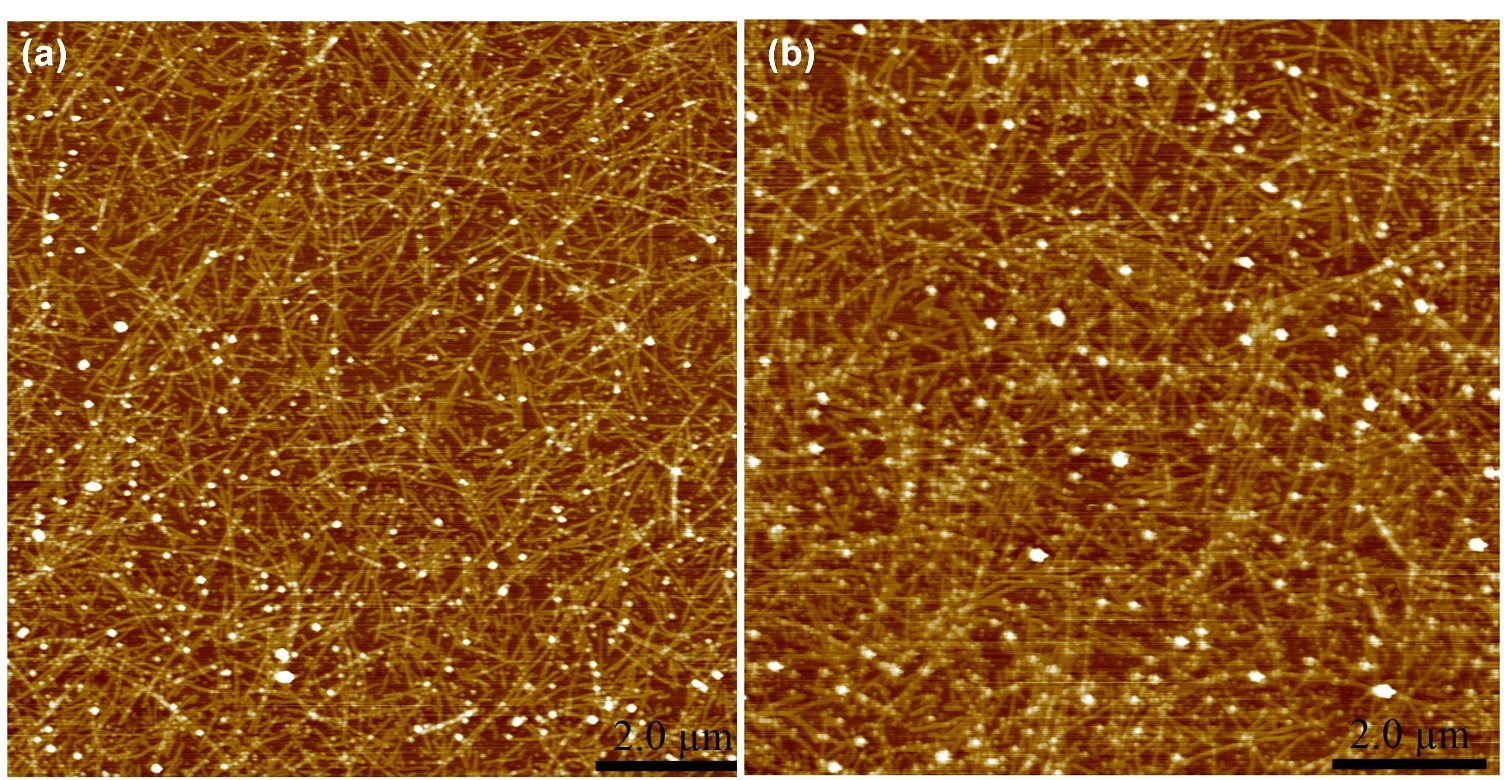


**Figure S7** AFM images for samples of HEWL ground with 6T (a) and 8T after fibril formation (24 h of heating and stirring) (b)


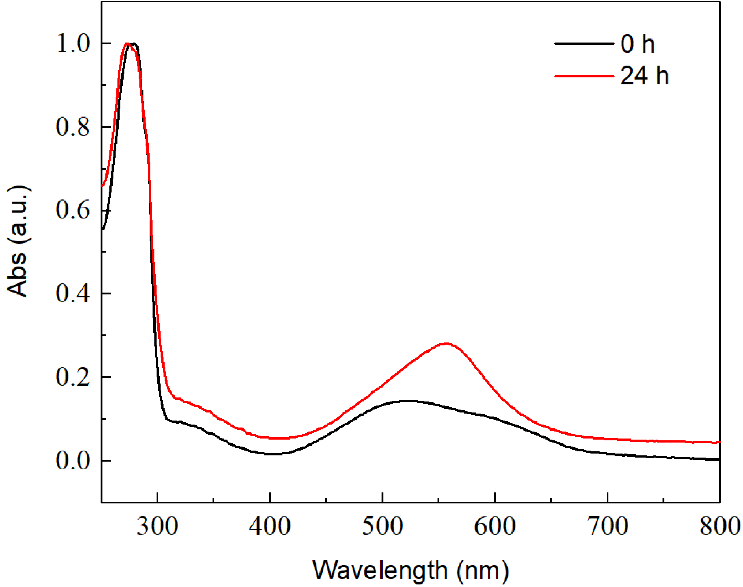


**Figure S8** Absorbance spectra in 25 mM HCl for Nile red:HEWL before (0 h) and after fibril formation (24 h). The Nile Red:HEWL composite material was prepared by grinding in a shaker mill.


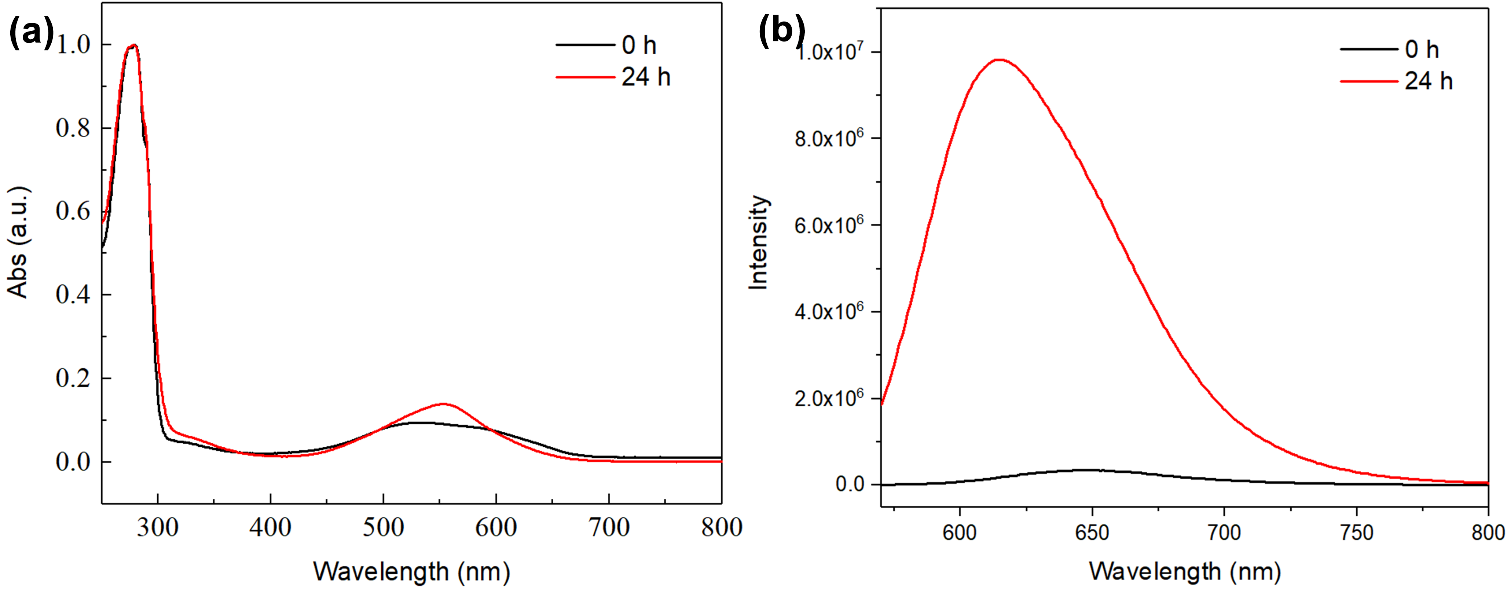


**Figure S9** Absorbance spectra (a) and fluorescence spectra (b) in 25 mM HCl for samples of Nile Red:HEWL before (0 h) and after fibril formation (24 h). The Nile Red:HEWL composite material was prepared by hand-grinding with mortar and pestle.


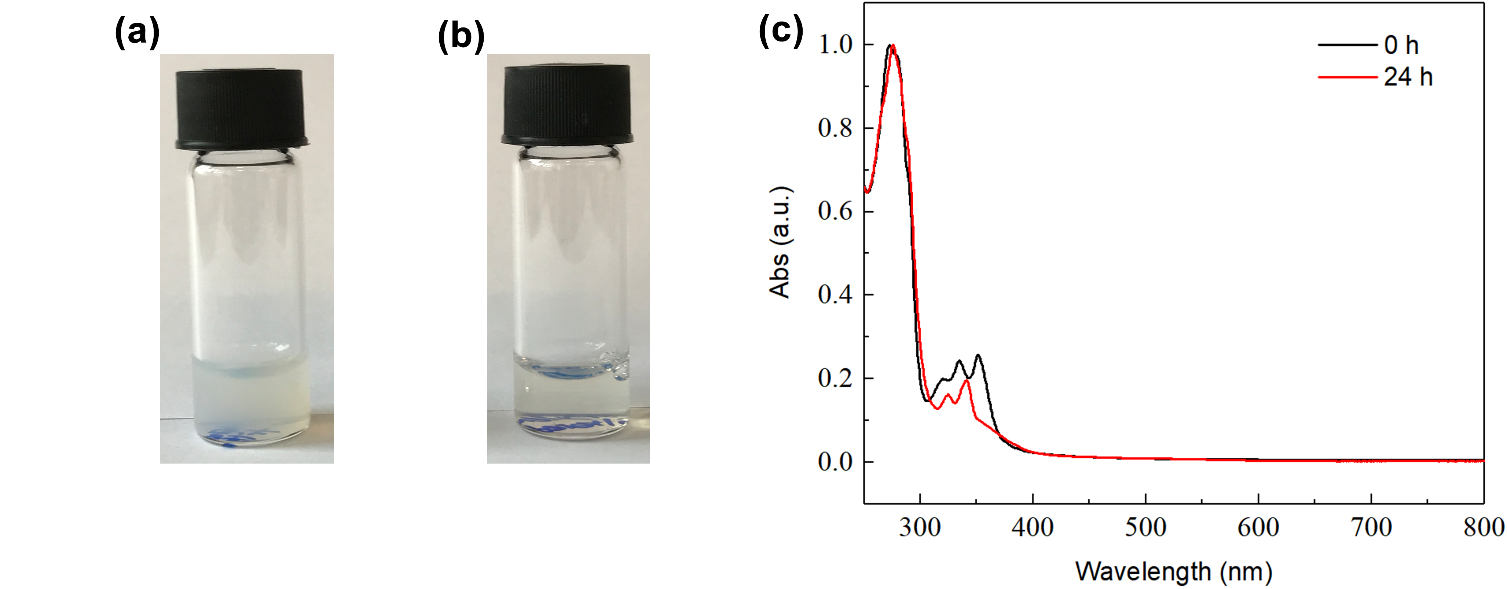


**Figure S10** Photograph at 25 mM HCl for samples of Pyrene:HEWL before (a) and after (b) filtration; Absorbance spectra in 25 mM HCl for samples of Pyrene:HEWL before (0 h) and after fibril formation (24 h) (c). The Pyrene:HEWL samples were prepared by grinding in a shaker mill.


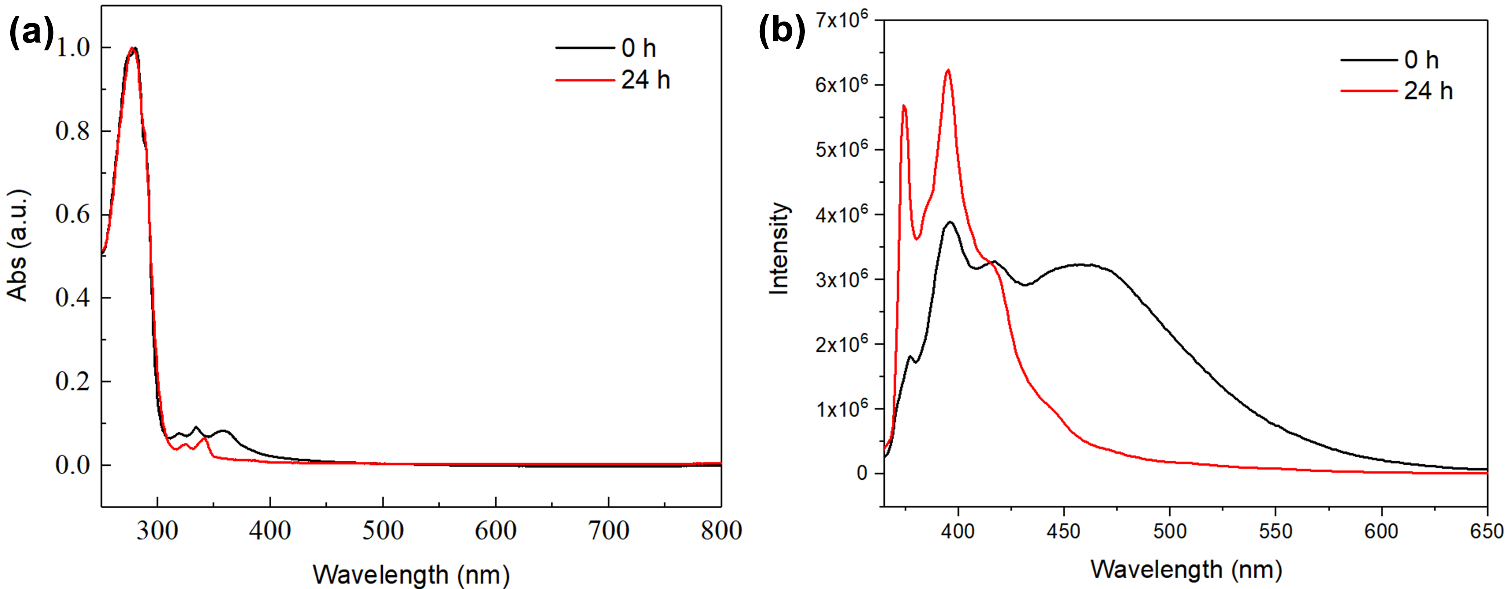


**Figure S11** Absorbance spectra (a) and fluorescence spectra (b) in 25 mM HCl for samples of Pyrene:HEWL before (0 h) and after fibril formation (24 h). The Pyrene:HEWL composite was prepared by hand-grinding with mortar and pestle.


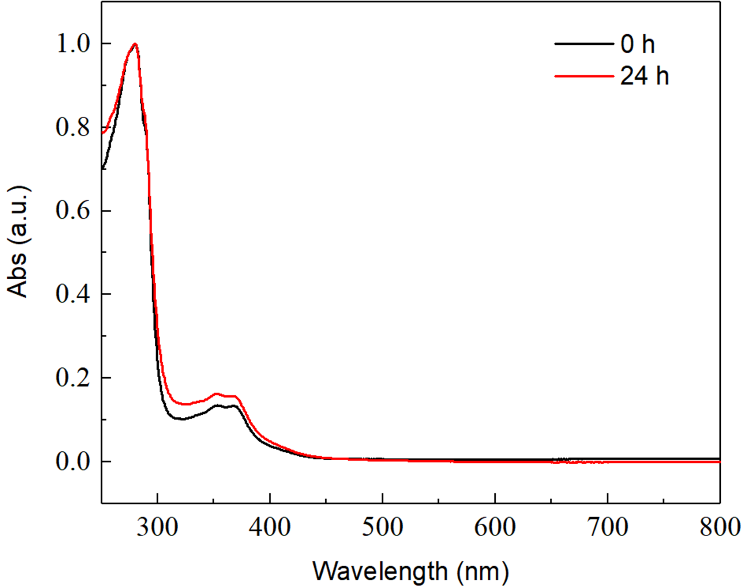


**Figure S12** Absorbance spectra in 25 mM HCl for samples of Camptothecin:HEWL before (0 h) and after fibril formation (24 h). The Camptothecin:HEWL composite material was prepared by grinding in a shaker mill.


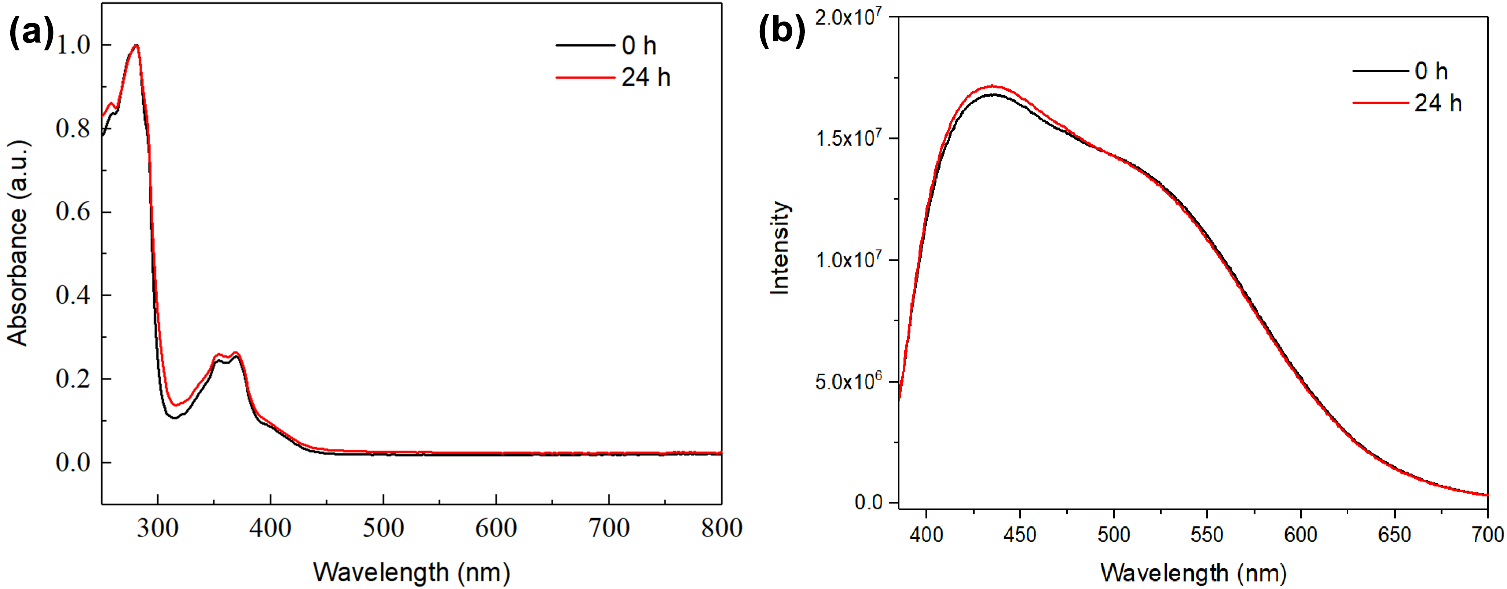


**Figure S13** Absorbance spectra (a) and fluorescence spectroscopy spectra (b) in 25 mM HCl for samples of Camptothecin:HEWL before (0 h) and after fibril formation (24 h).

The Camptothecin:HEWL composite material was prepared by hand-grinding with mortar and pestle.
